# Supplementary material for: Decrease in ovarian reserve through the inhibition of SIRT1-mediated oxidative phosphorylation
Source: publisher site journal article supplement (doi:10.18632/aging.203942), 2022-03-11
Supplement: Supplementary file [file aging-v14i5-203942-supplementary-material-SD1.pdf]

## SUPPLEMENTARY FIGURE

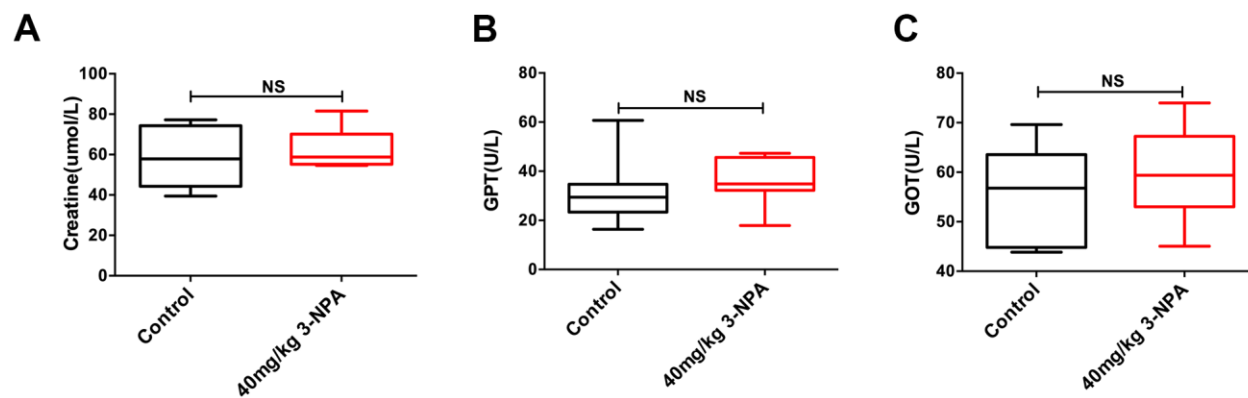

**Supplementary Figure 1. 40 mg/kg 3-NPA showed no liver and kidney toxicity.** (A–C) 40 mg/kg 3-NPA had no effect on mouse creatine, GPT and GOT (N=8 in all assays; NS: none significant).
